# Supplementary material for: Bombyx mori silk/titania/gold hybrid materials for photocatalytic water splitting: combining renewable raw materials with clean fuels
Source: publisher site journal article supplement (doi:10.3762/bjnano.9.21), 2018-01-17
Supplement: Additional file 1 [file 2190-4286-9-21-S1.pdf]

# Supporting Information

## for

### ***Bombyx mori* silk/titania/gold hybrid materials for photocatalytic water splitting: combining renewable raw materials with clean fuels**

Stefanie Krüger<sup>1</sup>, Michael Schwarze<sup>2</sup>, Otto Baumann<sup>3</sup>, Christina Günter<sup>4</sup>, Michael Bruns<sup>5</sup>, Christian Kübel<sup>6</sup>, Dorothee Vinga Szabó<sup>5</sup>, Rafael Meinus<sup>7</sup>, Verónica de Zea Bermudez<sup>8</sup> and Andreas Taubert\*<sup>1,§</sup>

Address: <sup>1</sup>Institute of Chemistry, University of Potsdam, D-14476 Potsdam, Germany, <sup>2</sup>Institute of Chemistry, Technical University Berlin, D-10623 Berlin, Germany, <sup>3</sup>Institute of Biochemistry and Biology, University of Potsdam, D-14476 Potsdam, Germany, <sup>4</sup>Institute of Earth and Environmental Science, University of Potsdam, D-14476 Potsdam, Germany, <sup>5</sup>Institute for Applied Materials (IAM) and Karlsruhe Nano Micro Facility (KNMF), Karlsruhe Institute of Technology (KIT), D-76344 Eggenstein-Leopoldshafen, Germany, <sup>6</sup>Institute of Nanotechnology (INT) and Karlsruhe Nano Micro Facility (KNMF), Karlsruhe Institute of Technology (KIT), D-76344 Eggenstein-Leopoldshafen, Germany, <sup>7</sup>Institute of Physical Chemistry, Justus-Liebig-University Giessen, D-35392 Giessen, Germany and <sup>8</sup>Department of Chemistry and CQ-VR, University of Trás-os-Montes e Alto Douro, Pt-5001-801 Vila Real, Portugal

Email: Andreas Taubert - ataubert@uni-potsdam.de

\* Corresponding author

§ Tel.: +49 (0) 331 977 5773

## **Additional data**

Table S1: Hybrid materials studied in this work. Note that only the main components are given. For details of sample preparation and composition see experimental section below.

|                                                | TS  | TS_Au <sub>x</sub> | TPS | TPS_Au <sub>x</sub>       |
|------------------------------------------------|-----|--------------------|-----|---------------------------|
| m (PEO <sub>780</sub> ) (mg)                   | -   | -                  | 200 | 200                       |
| m (PEO <sub>8300</sub> ) (mg)                  | -   | -                  | 200 | 200                       |
| m (Silk in silk solution) (mg)                 | 800 | 800                | 400 | 400                       |
| V (Ti(OiPr) <sub>4</sub> ) (mL)                | 5.0 | 5.0                | 5.0 | 5.0                       |
| m (HAuCl <sub>4</sub> ·3H <sub>2</sub> O) (mg) | -   | 2.5<br>5.6<br>6.1  | -   | 1.0<br>2.5<br>5.0<br>10.7 |

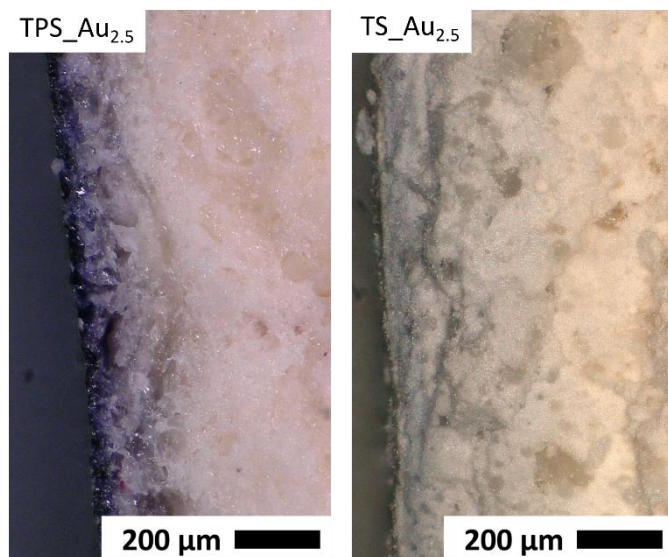

**Figure S1:** Digital microscopy images of TPS\_Au<sub>2.5</sub> and TS\_Au<sub>2.5</sub>. Top surface of the material is on the left hand side of both images.

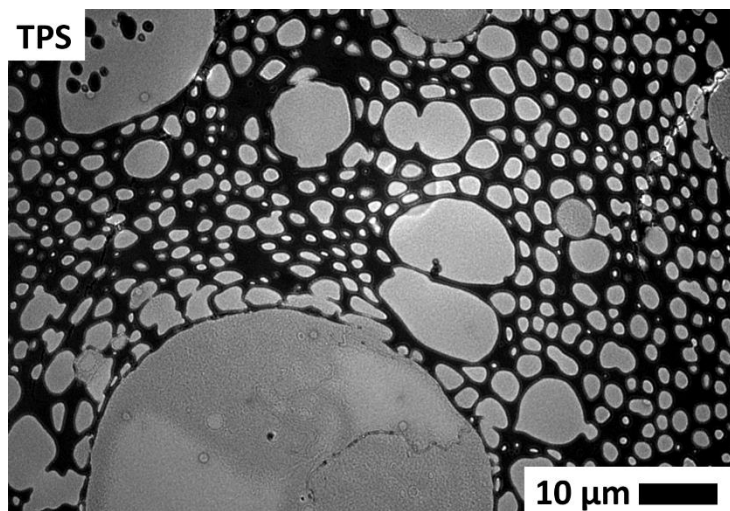

**Figure S2:** TEM image of TPS with a larger pore of around 50 μm (bottom of image).

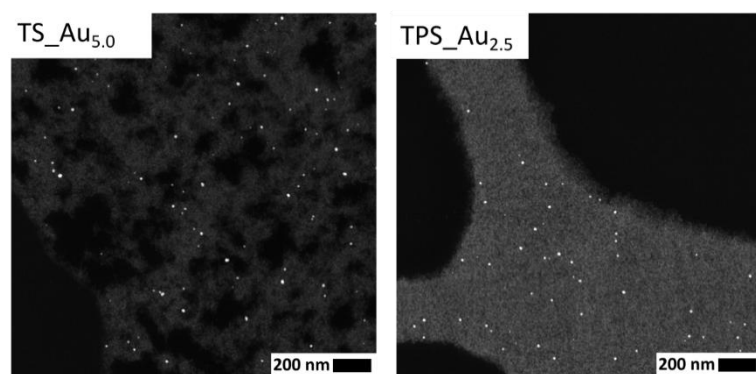

**Figure S3:** Dark field STEM (DF-STEM) image of TS\_Au<sub>5.0</sub> and TPS\_Au<sub>2.5</sub>. The light spots are the AuNP, the gray background is the titania/silk hybrid and black areas are holes or regions with very little material.

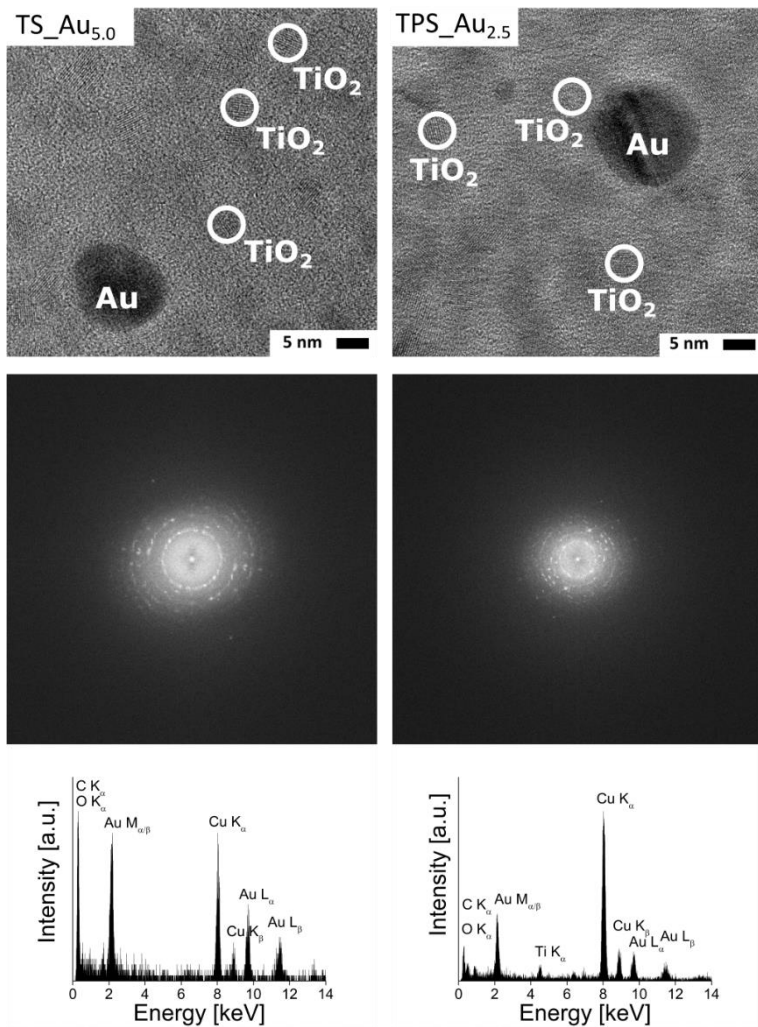

**Figure S4:** HRTEM images of TS\_Au<sub>5.0</sub> and TPS\_Au<sub>2.5</sub> along with the corresponding FFT images and EDX spectra. The copper signals stem from stray signals from the Cu-TEM grid. Carbon and oxygen signals may originate from TiO<sub>2</sub>, the surrounding silk, and/or embedding resin.

**Table S2:** Lattice spacings and corresponding hkl index assignments of the FFT evaluated using PASAD [1].

| measured              |        | anatase            |        | brookite           |        | Au                 |        |
|-----------------------|--------|--------------------|--------|--------------------|--------|--------------------|--------|
| TS_Au <sub>5.0</sub>  |        | [ICDD 98-015-4602] |        | [ICDD 00-029-1360] |        | [ICDD 00-004-0784] |        |
| K [1/nm]              | d [nm] | hkl                | d [nm] | hkl                | d [nm] | hkl                | d [nm] |
| 2.821                 | 0.354  | 011                | 0.353  | 120                | 0.351  |                    |        |
| 3.501                 | 0.286  |                    |        | 121                | 0.290  |                    |        |
| 4.231                 | 0.236  | 004                | 0.237  | 131                | 0.237  | 111                | 0.236  |
| 5.238                 | 0.191  | 020                | 0.190  | 231                | 0.189  |                    |        |
| 5.871                 | 0.170  | 015                | 0.170  | 320                | 0.169  |                    |        |
| 4.179 <sup>a</sup>    | 0.239  |                    |        |                    |        | 111                | 0.236  |
| 4.937 <sup>a</sup>    | 0.203  |                    |        |                    |        | 200                | 0.204  |
|                       |        |                    |        |                    |        |                    |        |
| measured              |        | anatase            |        | brookite           |        | Au                 |        |
| TPS_Au <sub>2.5</sub> |        | [ICDD 98-015-4602] |        | [ICDD 00-029-1360] |        | [ICDD 00-004-0784] |        |
| K [1/nm]              | d [nm] | hkl                | d [nm] | hkl                | d [nm] | hkl                | d [nm] |
| 2.868                 | 0.349  | 011                | 0.353  | 120                | 0.351  |                    |        |
| 4.693                 | 0.213  |                    |        | 221                | 0.213  |                    |        |
| 5.162                 | 0.194  | 020                | 0.190  | 032                | 0.197  |                    |        |
| 5.930                 | 0.169  | 015                | 0.170  | 320                | 0.169  |                    |        |
| 4.166 <sup>a</sup>    | 0.240  |                    |        |                    |        | 111                | 0.236  |
| 4.937 <sup>a</sup>    | 0.203  |                    |        |                    |        | 200                | 0.204  |

<sup>a</sup>Reflections measured directly on the particle.

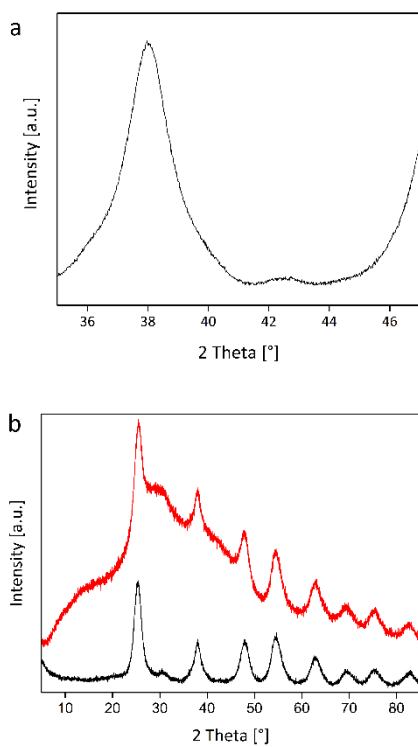

**Figure S5:** a) XRD pattern of TPS\_Au<sub>5.0</sub> highlighting the region between 35-47°. b) XRD patterns of a wet (red line) and dry (black line) TPS hybrid material.

**Table S3:** XPS binding energies, assignments to the respective binding partners, and atomic concentrations for the samples TS\_Au<sub>2.5</sub> and TPS\_Au<sub>2.5</sub>.

|                      |                                  | TPS_Au <sub>2.5</sub> [atom %] | TS_Au <sub>2.5</sub> [atom %] |                                     |
|----------------------|----------------------------------|--------------------------------|-------------------------------|-------------------------------------|
| Peak                 | Binding energy [eV] <sup>a</sup> | Atomic Concentration [%]       | Atomic Concentration [%]      | Assignment                          |
| Au 4f <sub>7/2</sub> | 84.0                             | 1.2                            | 2.2                           | Au <sup>0</sup> [2]                 |
| C 1s                 | 285.0                            | 16.2                           | 23.9                          | C-C/ C-H [3-6]                      |
|                      | 286.4                            | 21.0                           | 20.2                          | C-N/ C-O [3-7]                      |
|                      | 288.3                            | 16.7                           | 16.4                          | O=C-N/ O=C-OH [3-5,7]               |
| N 1s                 | 400.1                            | 16.8                           | 16.4                          | C-N-H/ O=C-N [6-9]                  |
|                      | 402.0                            | 0.5                            | 0.6                           | C-N <sup>+</sup> H <sub>x</sub> [3] |
| Ti 2p <sub>3/2</sub> | 459.0                            | 2.1                            | 0.2                           | TiO <sub>2</sub> [10]               |
|                      |                                  |                                |                               | Ti-O-C [11]                         |
| O 1s                 | 530.5                            | 4.7                            | -                             | TiO <sub>2</sub> [10]               |
|                      | 531.8                            | 16.9                           | 17.0                          | O=C-N/ O=C [3,6]                    |
|                      | 533.3                            | 3.5                            | 3.2                           | Ti-OH [12]                          |
|                      |                                  |                                |                               | C-O [3,6]                           |
|                      |                                  |                                |                               | Ti-OH [12]                          |

<sup>a</sup>The binding energies are referenced to the C 1s = 285.0 eV energy of hydrocarbons. In consequence the uncertainty for weak peaks (even for Au 4f<sub>7/2</sub>) is ±0.2 eV.

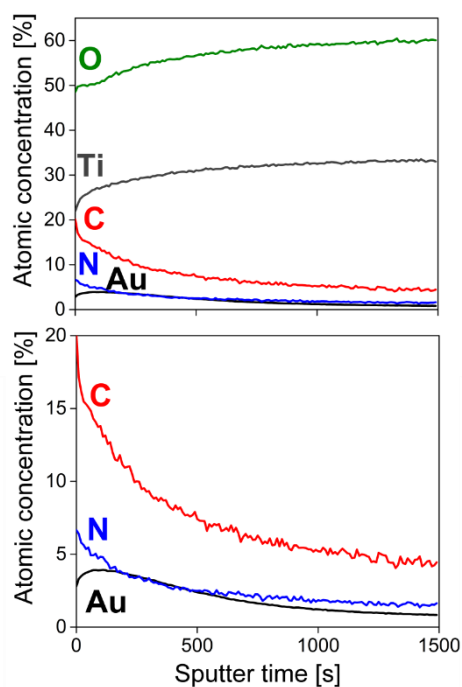

**Figure S6:** XPS sputter depth profiles of the TPS\_Au<sub>2.5</sub> surface (top) and a zoom in (bottom). Note: as it was not possible to determine the sample thickness [13], the data are represented vs. sputter time.

**Table S4:** Chemical composition of the hybrid materials obtained from EA.

| sample                        | C ± 0.3 % | H ± 0.3 % | N ± 0.3 % | total amount CHN |
|-------------------------------|-----------|-----------|-----------|------------------|
| TiO <sub>2</sub> <sup>a</sup> | 1.5       | 1.2       | 0         | 2.7              |
| silk                          | 46.2      | 7.2       | 17.9      | 71.3             |
| TPS                           | 9.5       | 2.4       | 3.4       | 15.2             |
| TPS_Au <sub>2.5</sub>         | 9.1       | 2.3       | 3.3       | 14.6             |
| TS                            | 13.3      | 2.9       | 4.9       | 21.2             |
| TS_Au <sub>2.5</sub>          | 13.2      | 2.8       | 4.9       | 20.8             |

<sup>a</sup>The CHN amount in TiO<sub>2</sub> comes from unreacted Ti(OiPr)<sub>4</sub> and EtAcAc.



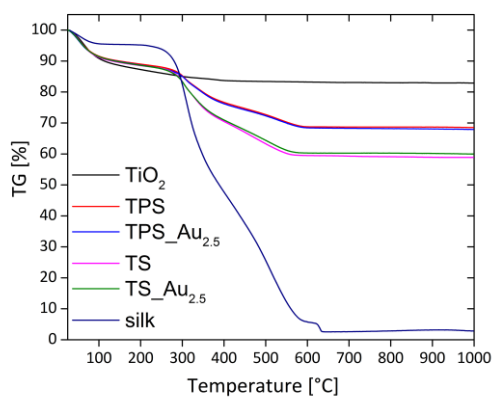

**Figure S7:** TGA curves of TiO<sub>2</sub> (black line) TPS (red line), TPS\_Au<sub>2.5</sub> (light blue line), TS (violet line), TS\_Au<sub>2.5</sub> (green line) and *B. mori* silk (dark blue line).

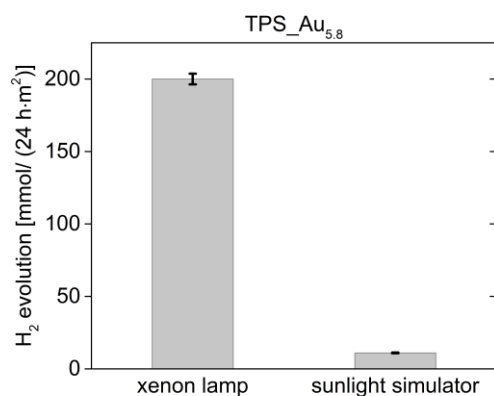

**Figure S8:** H<sub>2</sub> production of TPS\_Au<sub>5.8</sub> using a sunlight simulator or a xenon lamp.

A possible mechanism for water splitting in the presence of ethanol is shown in Equation S1–S5 (adapted by Chen et al. [14])

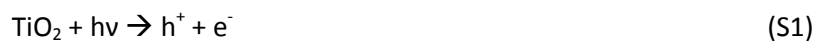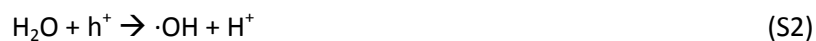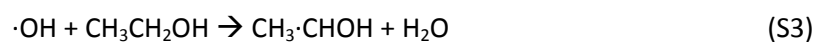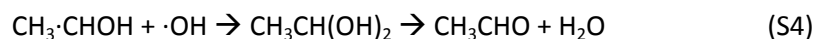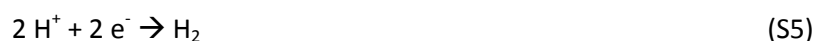

## References

- 1 C. Gammer, C. Mangler, C. Rentenberger and H. P. Karthaler, *Scr. Mater.*, 2010, **63**, 312–315.
- 2 Y. Joseph, I. Besnard, M. Rosenberger, B. Guse, H. Nothofer, J. M. Wessels, U. Wild, A. Knop-

- Gericke, D. Su, R. Schlögl, A. Yasuda and T. Vossmeier, *J. Phys. Chem. B*, 2003, **107**, 7406–7413.
- 3 N. Zydziak, C. M. Preuss, V. Winkler, M. Bruns, C. Hübner and C. Barner-Kowollik, *Macromol. Rapid Commun.*, 2013, **34**, 672–680.
  - 4 E. H. Lock, D. Y. Petrovykh, P. Mack, T. Carney, R. G. White, S. G. Walton and R. F. Fernsler, *Langmuir*, 2010, **26**, 8857–8868.
  - 5 C. Rodriguez-Emmenegger, C. M. Preuss, B. Yameen, O. Pop-Georgievski, M. Bachmann, J. O. Mueller, M. Bruns, A. S. Goldmann, M. Bastmeyer and C. Barner-Kowollik, *Adv. Mater.*, 2013, **25**, 6123–6127.
  - 6 S. Engin, V. Trouillet, C. M. Franz, A. Welle, M. Bruns and D. Wedlich, *Langmuir*, 2010, **26**, 6097–6101.
  - 7 C. M. Preuss, T. Tischer, C. Rodriguez-Emmenegger, M. M. Zieger, M. Bruns, A. S. Goldmann and C. Barner-Kowollik, *J. Mater. Chem. B*, 2014, **2**, 36–40.
  - 8 M. Bruns, C. Barth, P. Brüner, S. Engin, T. Grehl, C. Howell, P. Koelsch, P. MacK, P. Nagel, V. Trouillet, D. Wedlich and R. G. White, *Surf. Interface Anal.*, 2012, **44**, 909–913.
  - 9 T. Tischer, A. S. Goldmann, K. Linkert, V. Trouillet, H. G. Börner and C. Barner-Kowollik, *Adv. Funct. Mater.*, 2012, **22**, 3853–3864.
  - 10 I. Tunc, M. Bruns, H. Gliemann, M. Grunze and P. Koelsch, *Surf. Interface Anal.*, 2010, **42**, 835–841.
  - 11 B. Qiu, Y. Zhou, Y. Ma, X. Yang, W. Sheng, M. Xing and J. Zhang, *Sci. Rep.*, 2015, **5**, 8591.
  - 12 J. Yan, G. Wu, N. Guan, L. Li, Z. Li and X. Cao, *Phys. Chem. Chem. Phys.*, 2013, **15**, 10978–88.
  - 13 Mai, T.; Wolski, K.; Puciul-Malinowska, A.; Kopyshev, A.; Gräf, R.; Bruns, M.; Zapotoczny, S.; Taubert, A. Anionic Polymer Brushes for Biomimetic Calcium Phosphate Mineralization – a Surface with Application Potential in Biomaterials. *Biomacromolecules*, in press.
  - 14 X. Chen, S. Shen, L. Guo and S. S. Mao, *Chem. Rev.*, 2010, **110**, 6503–6570.
